# Supplementary material
Source: PubMed Central journal article supplement (PMC4601573)
Supplement: NIHMS628070-supplement-Supp_FigureS1-S7___TableS1-S8.pdf [file NIHMS628070-supplement-Supp_FigureS1-S7___TableS1-S8.pdf]

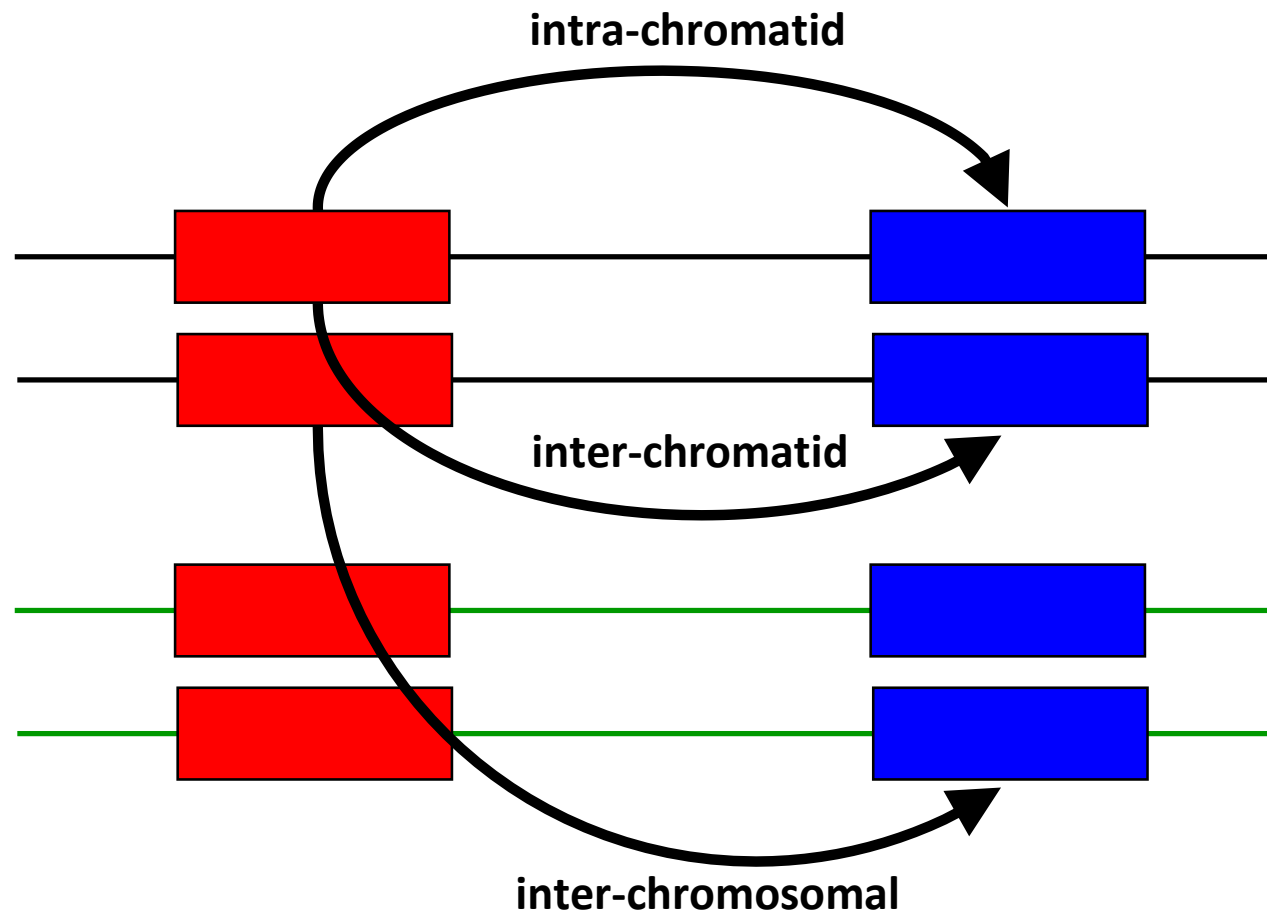

**Supp. Figure S1.** Different possible types of NAHR between NF1-REPa (red) and NF-REPa (blue) which represent nonallelic but highly similar sequences. The NAHR events are indicated by black arrows. The horizontal black lines represent sister chromatids of one chromosome 17 and the green lines the sister chromatids of the other chromosome 17.

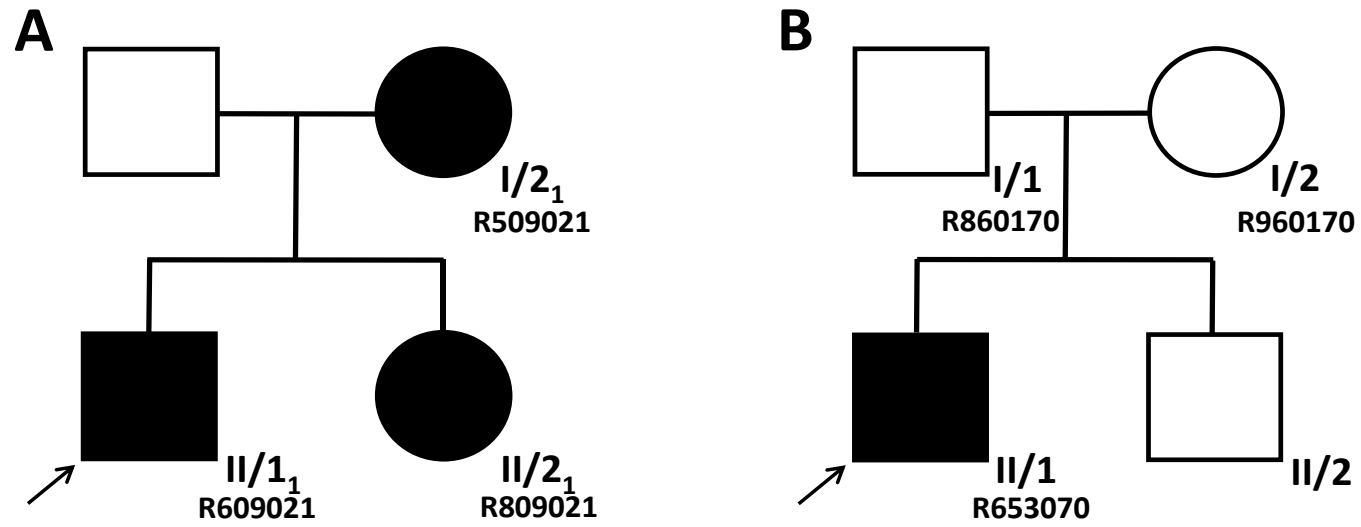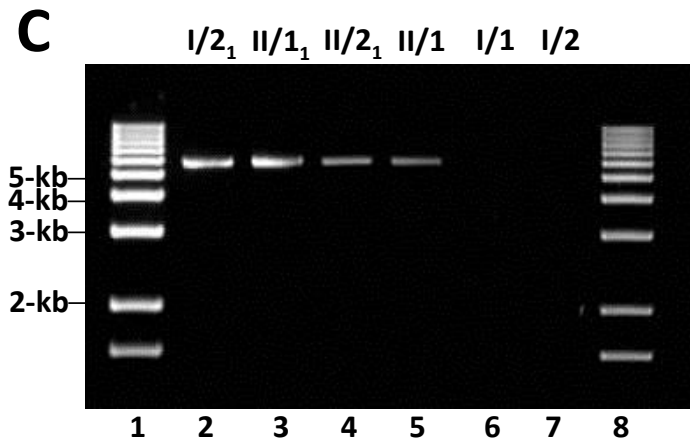

**Supp. Figure S2.** The large *NF1* duplications were detected by breakpoint-spanning PCR in the index patients R609021 and R653070. **(A)** Patient 609021 is a familial case since his mother and sister also harboured the duplication. **(B)** By contrast, patient R653070 most likely represents a sporadic patient whose parents did not harbour the deletion in their germ lines as ascertained by MLPA and breakpoint-spanning PCR performed on blood cell DNA. Also his brother (II/2) did not harbour the duplication as determined by MLPA. **(C)** Separation of the PCR-amplified 5.8-kb breakpoint-spanning fragments on an agarose gel. The breakpoint-spanning PCR was performed with a forward primer located in NF1-REPC and a reverse primer located in NF1-REPA. Size markers are indicated in lanes 1 and 8. The PCR products amplified from the duplication carriers are visible in lanes 2-5.

| Marker      | Position of marker  |     | R653070 |     | R960170 |     | R860170 |     |
|-------------|---------------------|-----|---------|-----|---------|-----|---------|-----|
| D17S1873    | 27457470 - 27457612 |     | 137     | 135 | 121     | 137 | 135     | 119 |
| D17S975     | 28099987 - 28100245 |     | 256     | 260 | 252     | 256 | 260     | 260 |
| D17S1532    | 28683996 - 28684165 |     | 170     | 170 | 174     | 170 | 170     | 164 |
| D17S1307    | 29473353 - 29473561 | 210 | 206     | 210 | 210     | 206 | 210     | 210 |
| NF1.PCR3    | 29589841 - 29590220 | 388 | 374     | 390 | 388     | 374 | 390     | 386 |
| D17S2237    | 29617725 - 29618128 | 400 | 392     | 404 | 400     | 392 | 404     | 400 |
| IVS27TG24.8 | 29640672 - 29640901 | 272 | 278     | 272 | 272     | 278 | 272     | 272 |
| IVS27AC28.4 | 29644294 - 29644500 | 205 | 203     | 211 | 205     | 203 | 211     | 209 |
| D17S1166    | 29649022 - 29649173 | 142 | 162     | 142 | 142     | 162 | 142     | 142 |
| IVS38GT53.0 | 29668522 - 29668693 | 186 | 176     | 186 | 186     | 176 | 186     | 186 |
| 3NF1        | 29919355 - 29919599 | 250 | 238     | 236 | 250     | 238 | 236     | 250 |
| D17S1800    | 29936829 - 29937098 | 278 | 274     | 272 | 278     | 274 | 272     | 284 |
| D17S1880    | 31013893 - 31014084 |     | 194     | 182 | 194     | 188 | 182     | 174 |
| D17S1293    | 32560166 - 32560449 |     | 278     | 274 | 278     | 258 | 274     | 266 |
| D17S907     | 33866310 - 33866639 |     | 286     | 326 | 286     | 318 | 326     | 290 |
| D17S1788    | 36086054 - 36086207 |     | 154     | 158 | 154     | 156 | 158     | 156 |
| D17S1809    | 62697450 - 62697596 |     | 134     | 140 | 134     | 144 | 140     | 142 |

**Supp. Figure S3.** Microsatellite marker analysis performed in order to determine the origin of the *NF1* duplication detected in patient R653070. The size of the respective marker alleles is indicated in bp. The coloured rectangles represent the inferred and estimated haplotypes. R960170 is the mother of patient R653070 whereas proband R860170 is his father. The grey rectangle demarcates the markers located within the *NF1* gene region. These markers are deleted on one chromosome 17 in patients with type-1 *NF1* deletions. In patient R653070, a duplication of these markers was observed. Comparing the haplotypes of the family members, we conclude that the *NF1* duplication occurred in the maternal germline by inter-chromosomal or inter-chromatid NAHR.

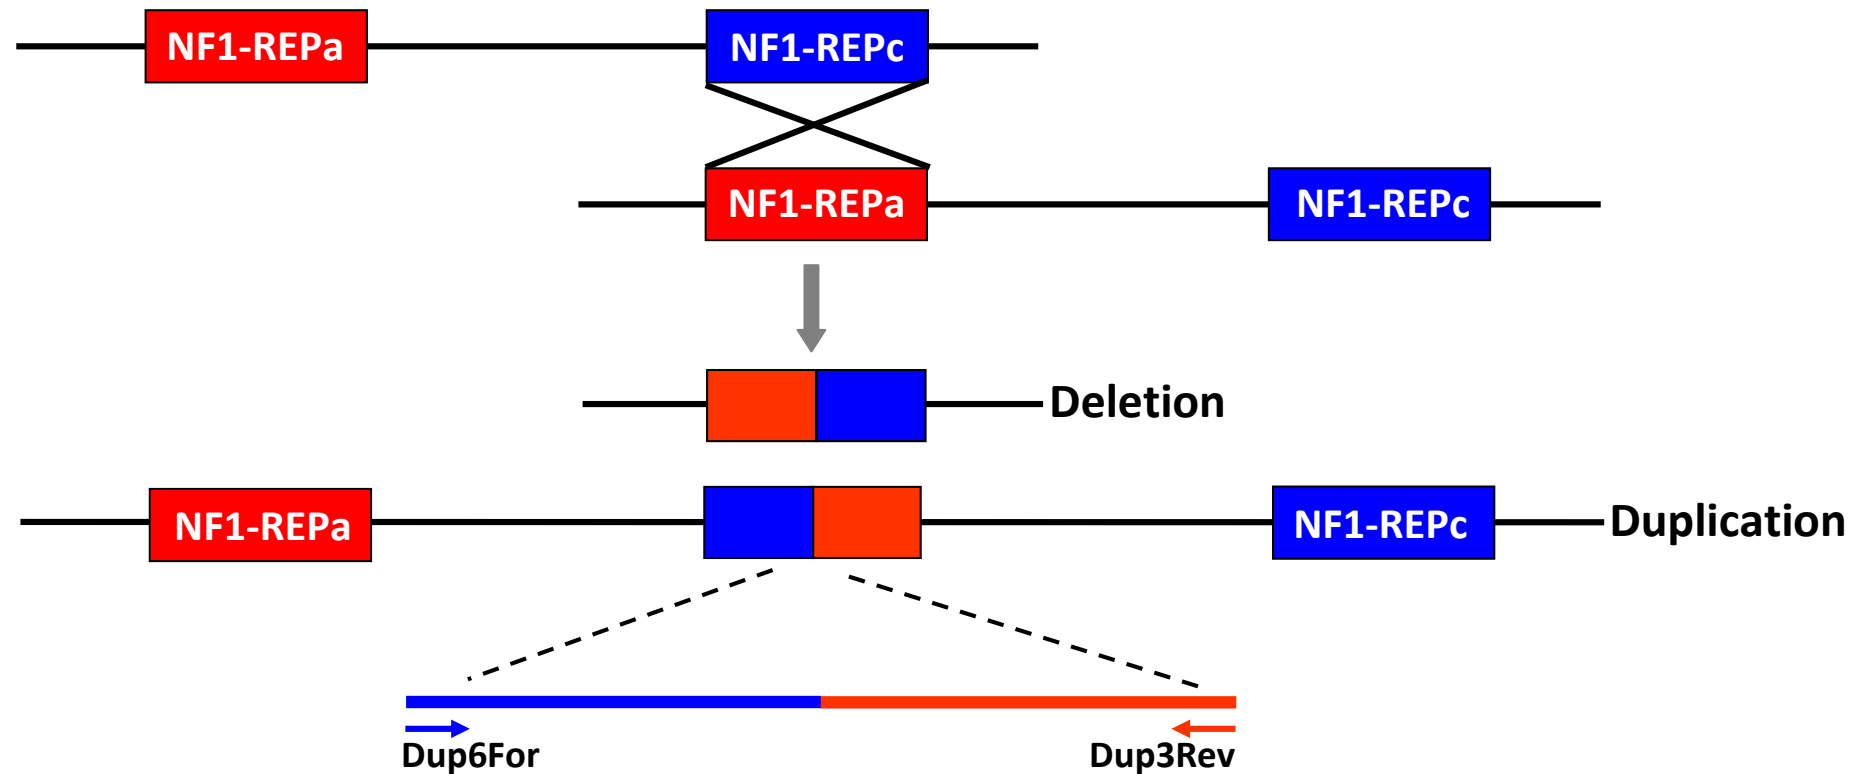

**Supp. Figure S4.** NAHR between the low-copy repeats NF1-REPa and NF1-REPC, either by an inter-chromosomal or an inter-chromatid mechanism, gives rise to an *NF1* deletion and its reciprocal *NF1* duplication. The duplication breakpoint-spanning PCR fragment of 5.8-kb is amplified with primers Dup6For and Dup3rev whose relative locations are indicated.

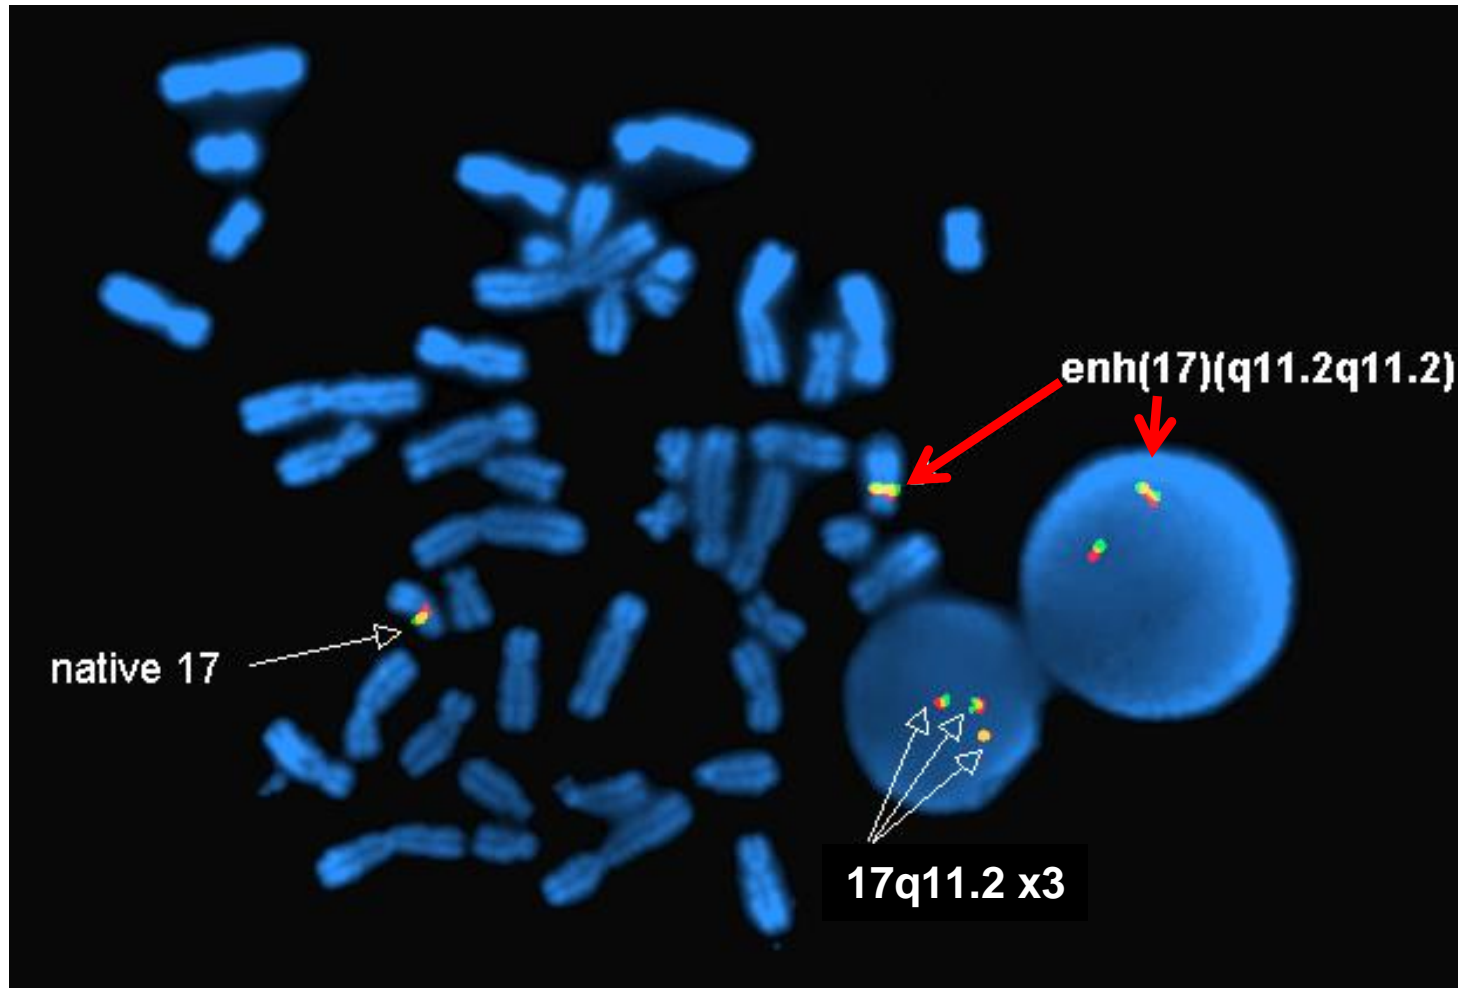

**Supp. Figure S5.** FISH confirmed the in-tandem *NF1* duplication in patient R653070. FISH was performed using probes RP5-1002G3 (visible as red fluorescent signals) and RP5-926B9 (green). FISH probe RP5-1002G3 is located in the telomeric region of the *NF1* gene, whereas FISH probe RP5-926B9 spans the centromeric part of the *NF1* gene. Thus, two red/green fusion FISH signals are indicative of one copy of the *NF1*

gene. However, in the patient, three red/green fusion FISH signals were detected, examples of which are shown in the lower interphase nucleus (three arrows). On the metaphase chromosomes and in many other interphase nuclei, two of the red/green fusion FISH signals were adjacent to one another giving rise to an enhanced (enh) FISH signal (marked by red arrows).

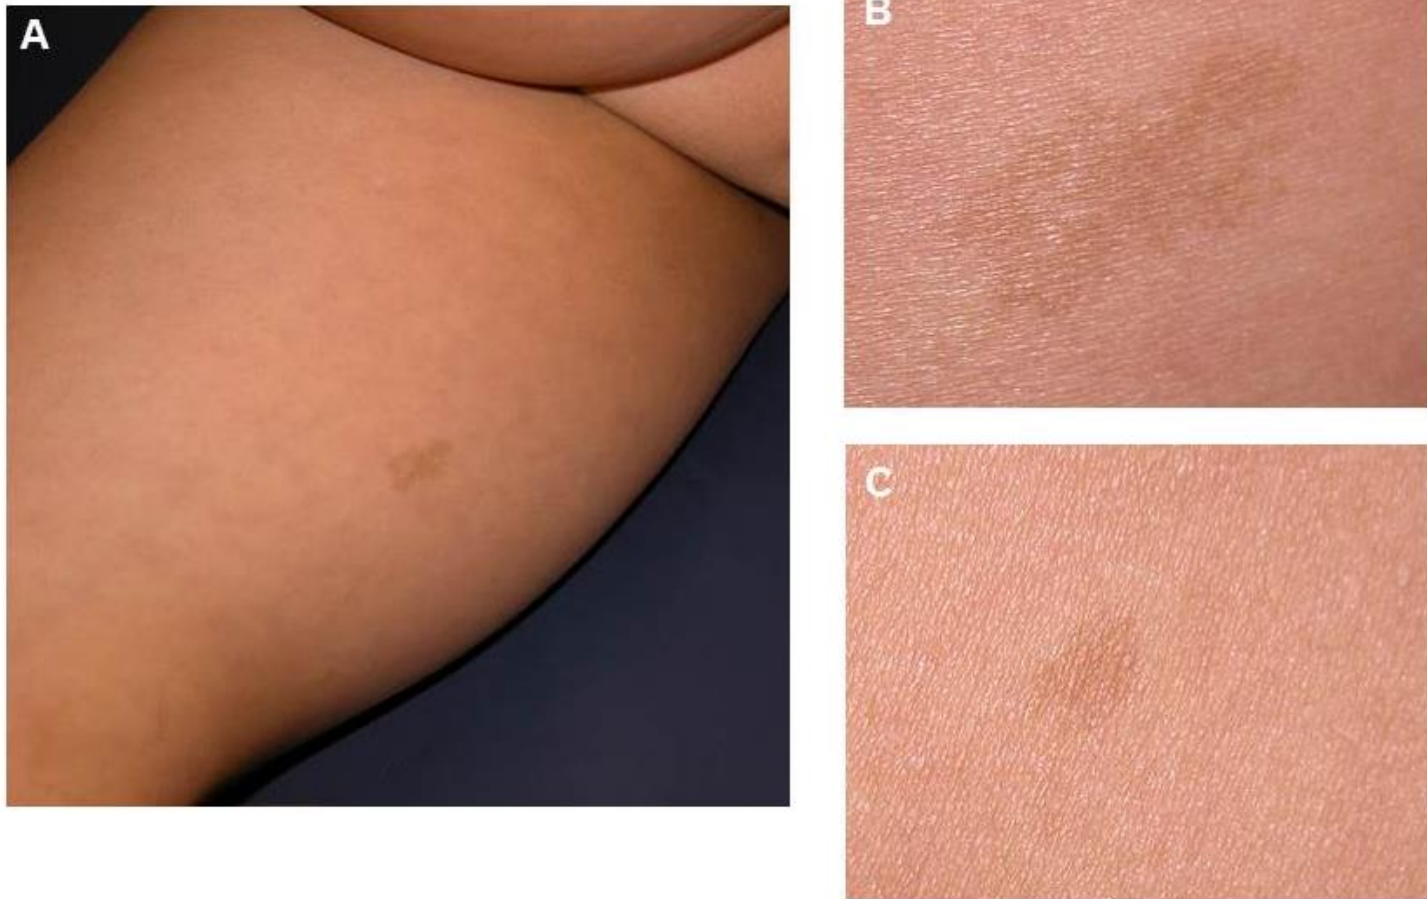

**Supp. Figure S6.** Café au lait spots observed in patient R609021. The café au lait spot located on the thigh seen in (A) is enlarged in (B) in order to show its irregular borders and the nonhomogeneous pigmentation. The café au lait spot in (C) is located on the abdomen.



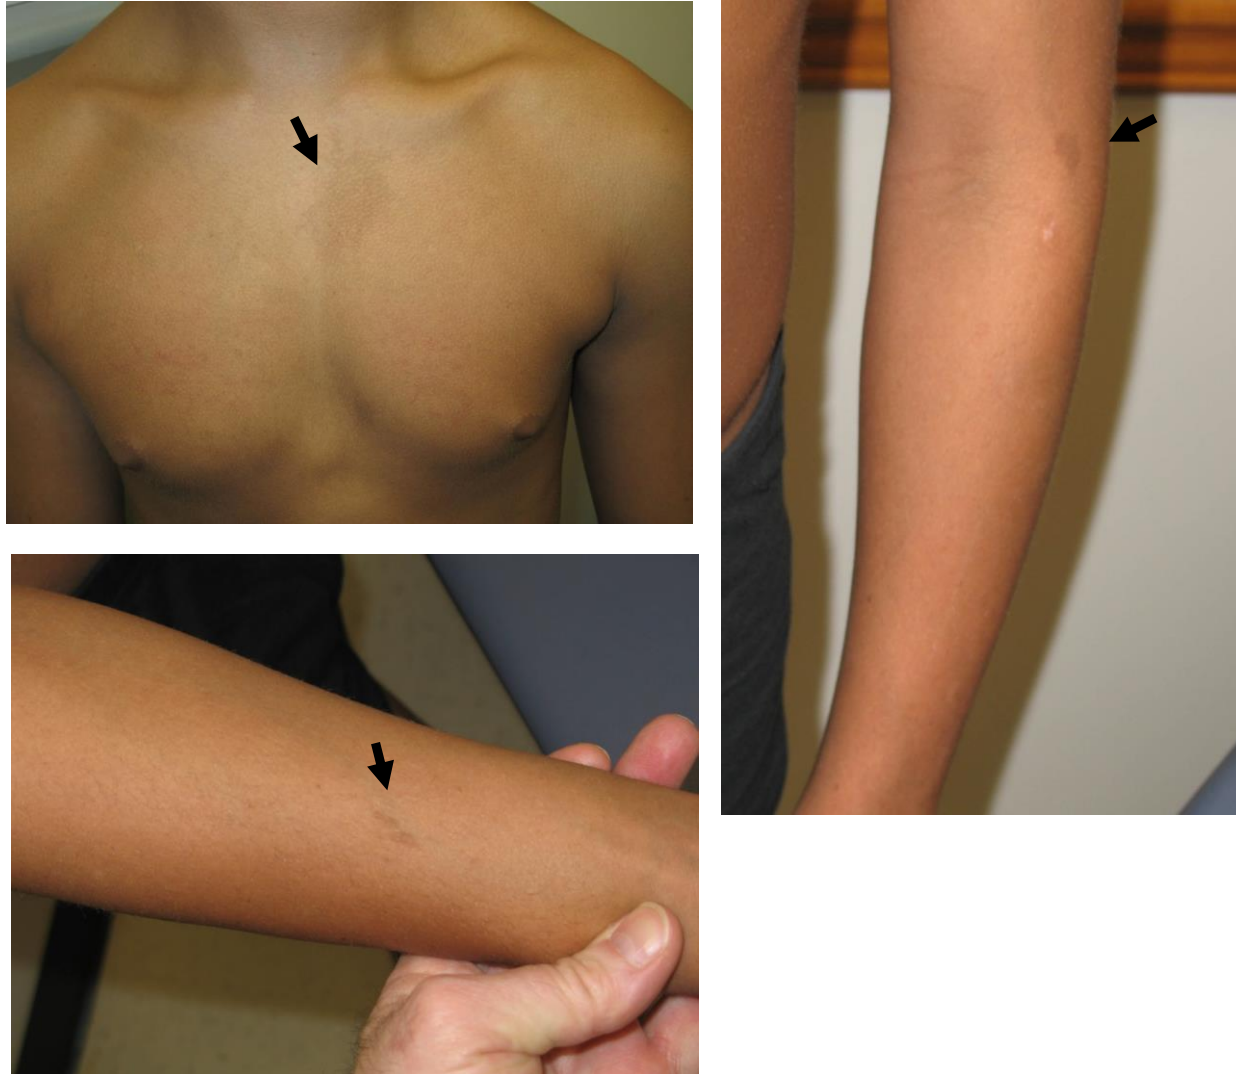

**Supp. Figure S7.** Café au lait spots observed in patient R653070.

**Supp. Table S1. Results of the MLPA analysis using the P122-C2 kit (MRC Holland, The Netherlands)**

| Probe designation            | Probe position on chromosome 17 (hg19) | P1<br>R609021 | P2<br>R509021 | P3<br>R809021 | P4<br>R653070 |
|------------------------------|----------------------------------------|---------------|---------------|---------------|---------------|
| <i>TRAF4</i> 9176-L9350      | 27,074,291-27,074,314                  | 0.99          | 0.99          | 0.95          | 0.92          |
| <i>TRAF4</i> 8620-L8632      | 27,075,052-27,075,075                  | 1.07          | 1.15          | 1.08          | 1.55          |
| <i>SSH2</i> 9635-L9920       | 27,963,580-27,963,603                  | 1.05          | 1             | 1.01          | 0.94          |
| <i>SSH2</i> 9634-L9919       | 28,022,495-28,022,518                  | 1.05          | 1.09          | 1.09          | 1.22          |
| <i>BLMH</i> 9627-L9912       | 28,599,612-28,599,635                  | 1.08          | 1.08          | 1.09          | 1.14          |
| <i>BLMH</i> 9626-L9911       | 28,618,478-28,618,501                  | 1             | 0.97          | 0.99          | 0.9           |
| <i>CPD</i> 9628-L9913        | 28,770,910-28,770,933                  | 1.06          | 1.02          | 1.01          | 0.94          |
| <i>CPD</i> 9629-L9914        | 28,789,420-28,789,443                  | 1.02          | 0.98          | 1             | 0.94          |
| <i>SUZ12p</i> 11798-L12590   | 29,058,391-29,058,414                  | <b>1.38</b>   | <b>1.38</b>   | <b>1.41</b>   | <b>1.46</b>   |
| <i>SUZ12p</i> 11801-L12592   | 29,085,145-29,085,168                  | <b>1.45</b>   | <b>1.43</b>   | <b>1.42</b>   | <b>1.54</b>   |
| <i>CRLF3</i> 3780-L3289      | 29,124,380-29,124,403                  | <b>1.38</b>   | <b>1.45</b>   | <b>1.42</b>   | <b>1.42</b>   |
| <i>ATAD5</i> 3781-L3290      | 29,162,044-29,162,067                  | <b>1.45</b>   | <b>1.54</b>   | <b>1.48</b>   | <b>1.73</b>   |
| <i>CENTA2</i> 3782-L3291     | 29,253,873-29,253,896                  | <b>1.52</b>   | <b>1.55</b>   | <b>1.53</b>   | <b>1.88</b>   |
| <i>RNF135</i> 3783-L3292     | 29,311,688-29,311,711                  | <b>1.45</b>   | <b>1.47</b>   | <b>1.47</b>   | <b>1.63</b>   |
| <i>NFI</i> Ex. 1 2491-L1922  | 29,421,598-29,421,621                  | <b>1.41</b>   | <b>1.4</b>    | <b>1.44</b>   | <b>1.29</b>   |
| <i>NFI</i> Ex. 17 2507-L1938 | 29,552,202-29,552,225                  | <b>1.44</b>   | <b>1.49</b>   | <b>1.46</b>   | <b>1.84</b>   |
| <i>NFI</i> Ex. 30 2512-L1943 | 29,576,023-29,576,046                  | <b>1.33</b>   | <b>1.29</b>   | <b>1.34</b>   | <b>1.35</b>   |
| <i>NFI</i> Ex. 49 2525-L1956 | 29,676,152-29,676,175                  | <b>1.58</b>   | <b>1.54</b>   | <b>1.52</b>   | <b>1.43</b>   |
| <i>NFI</i> Ex. 57 5220-L3309 | 29,687,576-29,687,599                  | <b>1.39</b>   | <b>1.39</b>   | <b>1.36</b>   | <b>1.33</b>   |
| <i>UTP6</i> 3785-L3294       | 30,202,348-30,202,371                  | <b>1.5</b>    | <b>1.52</b>   | <b>1.49</b>   | <b>1.72</b>   |
| <i>SUZ12-10</i> 3786-L3295   | 30,315,410-30,315,433                  | <b>1.47</b>   | <b>1.48</b>   | <b>1.45</b>   | <b>1.53</b>   |
| <i>LRRC37B</i> 3787-L3296    | 30,348,569-30,348,592                  | <b>1.47</b>   | <b>1.56</b>   | <b>1.48</b>   | <b>1.72</b>   |
| <i>ZNF207</i> 9637-L9949     | 30,693,753-30,693,776                  | 1.1           | 1.07          | 1.06          | 1.08          |
| <i>PSMD11</i> 9632-L9917     | 30,773,979-30,774,002                  | 1.01          | 0.99          | 0.99          | 0.9           |
| <i>PSMD11</i> 9633-L9918     | 30,796,071-30,796,094                  | 1.08          | 1.13          | 1.06          | 1.22          |
| <i>MYO1D</i> 9631-L9916      | 31,094,710-31,094,733                  | 1.04          | 1.06          | 1.04          | 1.25          |
| <i>MYO1D</i> 9630-L9915      | 31,107,652-31,107,675                  | 1.1           | 1.06          | 1.1           | 1.17          |

**Supp. Table S2. Sequences and locations of the primers used to amplify the 5811-bp *NF1* duplication breakpoint-spanning PCR product**

| Primer  | 5'→3' sequence            | Position of the primer in <sup>a</sup> |                           |
|---------|---------------------------|----------------------------------------|---------------------------|
|         |                           | NF1-REPa                               | NF1-REPc                  |
| Dup6for | AATGAAGACAAGGGCTCACTGCATC |                                        | 30,408,259-<br>30,408,283 |
| Dup3rev | AAGGGGCTCGGAGAAGTTAAGG    | 28,997,938-<br>28,997,959              |                           |

a: chromosomal positions are indicated according to human genome assembly hg19

**Supp. Table S3. Cycle conditions for the PCR performed with primers Dup6for and Dup3rev in order to amplify the *NFI* duplication breakpoint-spanning fragment**

| Step | Description          | Temperature [°C] | Time [min]        |
|------|----------------------|------------------|-------------------|
| 1    | initial denaturation | 94               | 10 min            |
| 2    | denaturation         | 94               | 30 sec            |
| 3    | primer annealing     | 60               | 30 sec            |
| 4    | elongation           | 68               | 4 min plus 30 sec |
| 5    | final elongation     | 68               | 5 min             |

Steps 2-4 were repeated 35 times.

**Supp. Table S4. Primers used to sequence the *NF1* duplication breakpoint-spanning PCR product of 5811-bp amplified with primers Dup6for and Dup3rev**

| Primer    | 5' → 3' sequence        | Position <sup>a</sup> of primer on chromosome 17 in |                       | Annealing temperature |
|-----------|-------------------------|-----------------------------------------------------|-----------------------|-----------------------|
|           |                         | NF1-REPa                                            | NF1-REPC              |                       |
| 2290 hin  | TCAACCTCCCAGGCTCCCGAA   | 28,992,825-28,992,845                               | 30,408,907-30,408,951 | 62°C                  |
| 2314rev   | TTTGACGTGTGACCTTCCACA   | 28,996,756-28,996,777                               | 30,412,872-30,412,893 | 62°C                  |
| Typ1_1rev | CCAGGCCCTCTTCTCTAGA     | 28,996,360-28,996,379                               | 30,412,476-30,412,495 | 62°C                  |
| Typ1_2for | AGGCTGGTCTCCAACCTCCTT   | 28,993,753-28,993,772                               | 30,409,862-30,409,881 | 58°C                  |
| Typ1_5for | ATCTGCCTTCCAAGAAGTGC    | 28,996,422-28,996,441                               | 30,412,538-30,412,557 | 58°C                  |
| Typ1_6rev | TCTAGGTTTTCTGAGGTCACACC | 28,993,959-28,993,981                               | 30,410,068-30,410,090 | 58°C                  |
| Typ1_7rev | GCAGGAGGATAGTTTGAACCAG  | 28,992,946-28,992,967                               | 30,409,052-30,409,073 | 58°C                  |
| Typ1_8rev | TTCCCCAGCCGGAGAGAG      | 28,995,165-28,995,182                               | 30,411,276-30,411,293 | 60°C                  |
| Typ1_9rev | GGGACAGTTGAGGGGGTACT    | 28,995,515-28,995,534                               | 30,411,630-30,411,649 | 58°C                  |
| Typ1_5rev | AAGTTAAGGGCCAGGCACA     | 28,993,673-28,993,692                               | 30,409,781-30,409,799 | 58°C                  |

a: chromosomal positions are indicated according to the human genome assembly hg19

**Supp. Table S5. Sequence analysis of the *NF1* duplication breakpoint-spanning PCR products which were amplified from genomic DNA of patients R609021 and R653070**

| PSV | Position of PSV in    |                       | Nucleotides at PSV sites in |                              | PSVs identified with the breakpoint-spanning PCR products in patients |                               |
|-----|-----------------------|-----------------------|-----------------------------|------------------------------|-----------------------------------------------------------------------|-------------------------------|
|     | NF1-REPC (hg19)       | NF1-REPA (hg19)       | NF1-REPA                    | NF1-REPC                     | R609021 <sup>a</sup>                                                  | R653070                       |
| 1   | 30,408,920-30,408,943 | 28,992,837-28,992,838 | –                           | CTCAAGTGATCC<br>TCCCACCTCAGC | CTCAAGTGATCCCTCC<br>CACCTCAGC                                         | CTCAAGTGATCCCTCC<br>CACCTCAGC |
| 2   | 30,409,076            | 28,992,970            | T                           | C                            | C                                                                     | C                             |
| 3   | 30,409,221            | 28,993,115            | A                           | G                            | G                                                                     | G                             |
| 4   | 30,409,276            | 28,993,170            | A                           | G                            | G                                                                     | G                             |
| 5   | 30,409,478            | 28,993,372            | C                           | T                            | T                                                                     | T                             |
| 6   | 30,409,490-30,409,491 | 28,993,382-28,993,383 | –                           | TC                           | TC                                                                    | TC                            |
| 7   | 30,409,720            | 28,993,613            | T                           | G                            | G                                                                     | G                             |
| 8   | 30,409,728            | 28,993,621            | A                           | G                            | G                                                                     | G                             |
| 9   | 30,409,735            | 28,993,628            | T                           | C                            | C                                                                     | C                             |
| 10  | 30,409,736            | 28,993,629            | G                           | A                            | A                                                                     | A                             |
| 11  | 30,409,738            | 28,993,631            | C                           | T                            | T                                                                     | T                             |
| 12  | 30,409,743            | 28,993,636            | C                           | T                            |                                                                       |                               |
| 13  | 30,409,744            | 28,993,637            | A                           | G                            |                                                                       |                               |
| 14  | 30,409,841-30,409,842 | 28,993,733-28,993,734 | –                           | AG                           | AG                                                                    | AG                            |
| 15  | 30,409,888            | 28,993,779            | T                           | A                            | A                                                                     | A                             |
| 16  | 30,409,952            | 28,993,843            | G                           | T                            | T                                                                     | T                             |
| 17  | 30,410,094            | 28,993,986            | T                           | –                            | –                                                                     | –                             |
| 18  | 30,410,767            | 28,994,656            | C                           | A                            | A                                                                     | C*                            |
| 19  | 30,411,033            | 28,994,921            | C                           | A                            | A                                                                     | C*                            |
| 20  | 30,411,096            | 28,994,985            | C                           | –                            | –                                                                     | –                             |
| 21  | 30,412,077            | 28,995,962            | T                           | C                            | C                                                                     | C                             |
| 22  | 30,412,090            | 28,995,975            | T                           | G                            | G                                                                     | G                             |
| 23  | 30,412,107            | 28,995,992            | G                           | A                            | G*                                                                    | G*                            |
| 24  | 30,412,191            | 28,996,075            | –                           | A                            | A                                                                     | A                             |
| 25  | 30,412,617            | 28,996,501            | A                           | G                            | A                                                                     | G                             |
| 26  | 30,412,702            | 28,996,586            | C                           | T                            | C                                                                     | T                             |
| 27  | 30,412,772            | 28,996,656            | A                           | G                            | A                                                                     | A                             |
| 28  | 30,412,799            | 28,996,683            | C                           | T                            | C                                                                     | C                             |
| 29  | 30,412,871            | 28,996,755            | A                           | C                            | A                                                                     | A                             |

–: Allele harbouring the deletion of this indel variant

a: The same PSVs as observed in patient R609021 were also detected in his mother and sister who also harbour the *NF1* duplication.

The analysis of paralogous sequence variants (PSVs) indicated the regions of strand exchange between NF1-REPA (red) and NF1-REPC (blue). The regions of strand exchange during nonallelic homologous recombination (NAHR) giving rise to these *NF1* duplications are located within the PRS2 recombination hotspot. This hotspot also harbours the regions of strand exchange of type-1 *NF1* deletions [De Raedt et al., 2006; Bengesser et al., 2014]. PSVs 1-29 indicated in this table are located in a 4-kb region within the NF1-REPs which harbours the PRS2 hotspot. In both patients with type-1 *NF1* duplications (R609021 and R653070), gene conversion was detected in sequences flanking the regions of strand exchange. The corresponding PSVs that we infer have been affected by gene conversion are marked by asterisks.

**Supp. Table S6. Location of the regions of strand exchange during NAHR causing type-1 *NF1* deletions and their reciprocal duplications**

| PSV | Position of PSV in    |                       | Nucleotides at PSV sites observed in breakpoint-spanning PCR fragments of patients with type-1 <i>NF1</i> deletions and duplications |       |       |       |       |       |       |       |       |        |        |        |        |        |        |        |        |        |        |        |             |             |   |
|-----|-----------------------|-----------------------|--------------------------------------------------------------------------------------------------------------------------------------|-------|-------|-------|-------|-------|-------|-------|-------|--------|--------|--------|--------|--------|--------|--------|--------|--------|--------|--------|-------------|-------------|---|
|     | NF1-REPa              | NF1-REPC              | DEL 1                                                                                                                                | DEL 2 | DEL 3 | DEL 4 | DEL 5 | DEL 6 | DEL 7 | DEL 8 | DEL 9 | DEL 10 | DEL 11 | DEL 12 | DEL 13 | DEL 14 | DEL 15 | DEL 16 | DEL 17 | DEL 18 | DEL 19 | DEL 20 | DUP R609021 | DUP R653070 |   |
| 1   | 28,992,837-28,992,838 | 30,408,920-30,408,943 |                                                                                                                                      |       |       |       |       |       |       |       |       |        |        |        |        |        |        |        |        |        |        |        |             |             |   |
| 2   | 28,992,970            | 30,409,076            |                                                                                                                                      |       |       |       |       |       |       |       |       |        |        |        |        |        |        |        |        |        |        |        |             |             |   |
| 3   | 28,993,115            | 30,409,221            |                                                                                                                                      |       |       |       |       |       |       |       |       |        |        |        |        |        |        |        |        |        |        |        |             |             |   |
| 4   | 28,993,170            | 30,409,276            |                                                                                                                                      |       |       |       |       |       |       |       |       |        |        |        |        |        |        |        |        |        |        |        |             |             |   |
| 5   | 28,993,372            | 30,409,478            |                                                                                                                                      |       |       |       |       |       |       |       |       |        |        |        |        |        |        |        |        |        |        |        |             |             |   |
| 6   | 28,993,382-28,993,383 | 30,409,490-30,409,491 |                                                                                                                                      |       |       |       |       |       |       |       |       |        |        |        |        |        |        |        |        |        |        |        |             |             |   |
| 7   | 28,993,613            | 30,409,720            |                                                                                                                                      |       |       |       |       |       |       |       |       |        |        |        |        |        |        |        |        |        |        |        |             |             |   |
| 8   | 28,993,621            | 30,409,728            |                                                                                                                                      |       |       |       |       |       |       |       |       |        |        |        |        |        |        |        |        |        |        |        |             |             |   |
| 9   | 28,993,628            | 30,409,735            |                                                                                                                                      |       |       |       |       |       |       |       |       |        |        |        |        |        |        |        |        |        |        |        |             |             |   |
| 10  | 28,993,629            | 30,409,736            |                                                                                                                                      |       |       |       |       |       |       |       |       |        |        |        |        |        |        |        |        |        |        |        |             |             |   |
| 11  | 28,993,631            | 30,409,738            |                                                                                                                                      |       |       |       |       |       |       |       |       |        |        |        |        |        |        |        |        |        |        |        |             |             |   |
| 12  | 28,993,636            | 30,409,743            |                                                                                                                                      |       |       |       |       |       |       |       |       |        |        |        |        |        |        |        |        |        |        |        |             |             |   |
| 13  | 28,993,637            | 30,409,744            |                                                                                                                                      |       |       |       |       |       |       |       |       |        |        |        |        |        |        |        |        |        |        |        |             |             |   |
| 14  | 28,993,733-28,993,734 | 30,409,841-30,409,842 |                                                                                                                                      |       |       |       |       |       |       |       |       |        |        |        |        |        |        |        |        |        |        |        |             |             |   |
| 15  | 28,993,779            | 30,409,888            |                                                                                                                                      |       |       |       |       |       |       |       |       |        |        |        |        |        |        |        |        |        |        |        |             |             |   |
| 16  | 28,993,843            | 30,409,952            |                                                                                                                                      |       |       |       |       |       |       |       |       |        |        |        |        |        |        |        |        |        |        |        |             |             |   |
| 17  | 28,993,986            | 30,410,094            |                                                                                                                                      |       |       |       |       |       |       |       |       |        |        |        |        |        |        |        |        |        |        |        |             |             |   |
| 18  | 28,994,656            | 30,410,767            |                                                                                                                                      |       |       |       |       |       |       |       |       |        |        |        |        |        |        |        |        |        |        |        |             |             | • |
| 19  | 28,994,921            | 30,411,033            |                                                                                                                                      |       |       |       |       |       |       |       |       |        |        |        |        |        |        |        |        |        |        |        |             |             | • |
| 20  | 28,994,985            | 30,411,096            |                                                                                                                                      |       |       |       |       |       |       |       |       |        |        |        |        |        |        |        |        |        |        |        |             |             |   |
| 21  | 28,995,962            | 30,412,077            |                                                                                                                                      |       |       |       |       |       |       |       |       |        |        |        |        |        |        |        |        |        |        |        |             |             |   |
| 22  | 28,995,975            | 30,412,090            |                                                                                                                                      |       |       |       |       |       |       |       |       |        |        |        |        |        |        |        |        |        |        |        |             |             |   |
| 23  | 28,995,992            | 30,412,107            |                                                                                                                                      |       |       |       |       |       |       |       |       |        |        |        |        |        |        |        |        |        |        |        |             |             |   |
| 24  | 28,996,075            | 30,412,191            |                                                                                                                                      |       |       |       |       |       |       |       |       |        |        |        |        |        |        |        |        |        |        |        |             | •           | • |
| 25  | 28,996,501            | 30,412,617            |                                                                                                                                      |       |       |       |       |       |       |       |       |        |        |        |        |        |        |        |        |        |        |        |             |             |   |
| 26  | 28,996,586            | 30,412,702            |                                                                                                                                      |       |       |       |       |       |       |       |       |        |        |        |        |        |        |        |        |        |        |        |             |             |   |
| 27  | 28,996,656            | 30,412,772            |                                                                                                                                      |       |       |       |       |       |       |       |       |        |        |        |        |        |        |        |        |        |        |        |             |             |   |
| 28  | 28,996,683            | 30,412,799            |                                                                                                                                      |       |       |       |       |       |       |       |       |        |        |        |        |        |        |        |        |        |        |        |             |             |   |
| 29  | 28,996,755            | 30,412,871            |                                                                                                                                      |       |       |       |       |       |       |       |       |        |        |        |        |        |        |        |        |        |        |        |             |             |   |

PSV positions are indicated according to hg19. Sequence analysis of the breakpoint-spanning PCR products revealed the indicated PSV pattern (blue: NF1-REPC-specific PSVs; red: NF1-REPa-specific PSVs). The regions of strand exchange, indicated by a green horizontal line, are located between PSVs derived from NF1-REPa (red) and NF1-REPC (blue).

PSVs 1-29 indicated in this table are located in a 4-kb region within the NF1-REPs which harbour the PRS2 hotspot. The region of strand exchange identified by the analysis of the 20 type-1 *NF1* deletions has been previously reported [Bengesser et al., 2014]. The regions of strand exchange of the *NF1* duplications in patients R609021 and R653070 are located telomeric to the regions of strand exchange identified in type-1 *NF1* deletions. In both patients with type-1 *NF1* duplications, gene conversion was detected in sequences flanking the regions of strand exchange. The corresponding PSVs that we infer have been affected by gene conversion are marked by black circles.

**Supp. Table S7. Summary of all *NFI* duplication carriers reported previously and in this study including the clinical features observed**

| Patient    | Age at diagnosis <sup>a</sup> | Sex | Dup. type | Inheritance              | Growth                                                       | Neuro-development | Neurology                     | Dysmorphic features                                                                                                          | Hair                                           | Tooth anomalies                  | Other                                                                                                                                                                                                                                     | Reference             |
|------------|-------------------------------|-----|-----------|--------------------------|--------------------------------------------------------------|-------------------|-------------------------------|------------------------------------------------------------------------------------------------------------------------------|------------------------------------------------|----------------------------------|-------------------------------------------------------------------------------------------------------------------------------------------------------------------------------------------------------------------------------------------|-----------------------|
| 1          | 13 y                          | F   | 1 or 2    | unknown                  | short stature, microcephaly                                  | DD                | seizures                      | not specified                                                                                                                | not specified                                  | not specified                    | subject 1 carried another copy-number variant, a BP1-BP2 15q11.2 deletion proximal to the Prader-Willi/ Angelman syndrome critical region. This deletion may predispose to neuro-cognitive disabilities, developmental delay and seizures | Moles et al. [2012]   |
| 2          | 4 y                           | M   | 1 or 2    | paternal                 | macrocephaly                                                 | severe DD, ID     | seizures                      | present, high palate and ankyloglossia                                                                                       | not present                                    | not specified                    | pectus excavatum, adducted thumbs, hypospadias, chronic lung disease                                                                                                                                                                      | Moles et al. [2012]   |
| 3          | unknown                       | F   | 1 or 2    | unknown                  | normal                                                       | normal            | unknown                       | absent                                                                                                                       | unknown                                        | unknown                          | healthy father of patient 2                                                                                                                                                                                                               | Moles et al. [2012]   |
| 4          | 11 y                          | M   | 1, 2 or 3 | unknown                  | failure to thrive                                            | severe DD         | seizures                      | present                                                                                                                      | not present                                    | not specified                    | dizziness, mitral valve prolapse, sib with similar phenotype (not tested)                                                                                                                                                                 | Moles et al. [2012]   |
| 5          | newborn                       | M   | 3         | <i>de novo</i>           | not specified                                                | not specified     | polymicrogyria                | bilateral CL/P, left iris coloboma                                                                                           | not specified                                  | not specified                    |                                                                                                                                                                                                                                           | Moles et al. [2012]   |
| 6          | 2 m                           | M   | 1 or 2    | unknown                  | not specified                                                | not specified     | not specified                 | present                                                                                                                      | not specified                                  | not specified                    |                                                                                                                                                                                                                                           | Moles et al. [2012]   |
| 7          | 21 y                          | M   | 1 or 2    | unknown                  | normal, small hands and feet                                 | DD, ID            | DTR3+                         | absent                                                                                                                       | not present                                    | not present                      | diabetes, hypertension, hypercholesteremia, GERD                                                                                                                                                                                          | Moles et al. [2012]   |
| 8          | 3 y                           | M   | 1 or 2    | maternal                 | height >97th PC, weight >95th PC, head circumference 70th PC | DD, speech delay  | normal MRI                    | flat midface, short palpebral fissures, short nose with mildly broad and flattened tip, smallmouth, unilateral lacrimal pit  | not present                                    | small lower teeth, widely spaced | irregular linear hypopigmented skin lesion, one faint CALS, strong adult body odour, unilateral microphthalmia                                                                                                                            | Moles et al. [2012]   |
| 9          | unknown                       | M   | 1 or 2    | unknown                  | not specified                                                | language delay    | not specified                 | flat midface, short palpebral fissures, short nose with mildly broad and flattened tip, congenital unilateral microphthalmia | not specified                                  | not specified                    | affected mother of patient 8                                                                                                                                                                                                              | Moles et al. [2012]   |
| 10-17      |                               |     |           |                          |                                                              |                   |                               |                                                                                                                              |                                                |                                  | family of 8 <i>NFI</i> duplication carriers, two individuals were not clinically affected                                                                                                                                                 | Grisart et al. [2008] |
| 10 (III.3) | 37 y                          | M   | 1         | paternal, father carrier | short stature (10th PC), microcephaly (5th PC)               | DD, ID            |                               | mild facial dysmorphic features, long midface, malar hypoplasia, nasal deformation                                           | early onset baldness at the age of 14-15 years | dental enamel hypoplasia         | brother of patient 11, large testes                                                                                                                                                                                                       | Grisart et al. [2008] |
| 11 (III.4) | 38 y                          | M   | 1         | paternal, father carrier | short stature, microcephaly                                  | DD, ID            | increased lower limb reflexes | mild facial dysmorphic features, long midface, malar hypoplasia, nasal deformation                                           | premature balding                              | dental enamel hypoplasia         | brother of patient 10, large testes                                                                                                                                                                                                       | Grisart et al. [2008] |
| 12 (III.9) | unknown                       | M   | 1         | paternal, father carrier | unknown                                                      | unknown           | unknown                       | unknown                                                                                                                      | unknown                                        | unknown                          | half-brother of patients 10 and 11                                                                                                                                                                                                        | Grisart et al. [2008] |
| 13 (II.6)  | unknown                       | M   | 1         | maternal, mother         | unknown                                                      | ID                | unknown                       | unknown                                                                                                                      | premature balding since the age of 18          | dental enamel hypoplasia         | father of patients 10, 11, and 12                                                                                                                                                                                                         | Grisart et al. [2008] |



| Patient    | Age at diagnosis <sup>a</sup> | Sex | Dup. type | Inheritance              | Growth                                            | Neuro-development                | Neurology     | Dysmorphic features                                         | Hair              | Tooth anomalies                                     | Other                                                                                                            | Reference             |
|------------|-------------------------------|-----|-----------|--------------------------|---------------------------------------------------|----------------------------------|---------------|-------------------------------------------------------------|-------------------|-----------------------------------------------------|------------------------------------------------------------------------------------------------------------------|-----------------------|
|            |                               |     |           | carrier                  |                                                   |                                  |               |                                                             | years             |                                                     |                                                                                                                  |                       |
| 14 (II.9)  | unknown                       | M   | 1         | maternal, mother carrier | short stature, microcephaly                       | ID                               | unknown       | unknown                                                     | premature balding | dental enamel hypoplasia                            | half-brother of patient 13                                                                                       | Grisart et al. [2008] |
| 15 (I.4)   | unknown                       | F   | 1         | unknown                  | unknown                                           | ID                               | unknown       | unknown                                                     | unknown           | unknown                                             | mother of patients 13 and 14, grandmother of patients 10, 11 and 12                                              | Grisart et al. [2008] |
| 16 (III.6) | unknown                       | F   | 1         | paternal, father carrier | not specified                                     | not specified                    | not specified | not specified                                               | not specified     | not specified                                       | healthy half-sister of patients 10 and 11, daughter of patient 13                                                | Grisart et al. [2008] |
| 17 (III.8) | unknown                       | F   | 1         | paternal, father carrier | not specified                                     | not specified                    | not specified | not specified                                               | not specified     | not specified                                       | healthy half-sister of patients 10 and 11, daughter of patient 13                                                | Grisart et al. [2008] |
| 18         | unknown                       | F   | 1 or 2    | unknown                  | failure to thrive, microcephaly                   | DD, ID                           | not specified | not specified                                               | not specified     | not specified                                       |                                                                                                                  | Lu et al. [2007]      |
| R609021    | 6.4 y                         | M   | 1         | maternal                 | short stature, no macrocephaly                    | DD, ID                           | not specified | short midface, bulging forehead with marked frontal bossing | not specified     | teeth and dental enamel anomalies were not detected | 6 CALS; autism spectrum disorder, hyperactivity and poor verbal communication skills; brother of patient R509021 | this study            |
| R809021    | 5.1 y                         | F   | 1         | maternal                 | short stature, no macrocephaly                    | not specified                    | not specified | short philtrum                                              | not specified     | not specified                                       | hyperactivity, autism spectrum disorder, sister of patient R809021                                               | this study            |
| R509021    | 28 y                          | F   | 1         | unknown                  | short stature, no macrocephaly                    | ID, learning disabilities        | not specified | big forehead, short philtrum                                | not specified     | not specified                                       | mother of patients R809021 and R509021                                                                           | this study            |
| R653070    | 11 y                          | M   | 1         | <i>de novo</i>           | no short stature, no microcephaly or macrocephaly | ID (IQ75), learning disabilities | not specified | not specified                                               | not specified     | not specified                                       | 10 CALS, Lisch nodules detected in both eyes, younger brother with developmental delay/autism spectrum disorder  | this study            |

a: age at diagnosis, years, months

CALS: café au lait spots

CL/P: cleft lip and palate

DD: developmental delay

ID: intellectual disability

DTRs 3+: deep tendon reflexes

F: female

GERD: gastroesophageal reflux disease

M: male

MRI; Magnetic resonance imaging

PC: percentile

**Supp. Table S8. Diagnostic criteria for neurofibromatosis 1 (NF1)<sup>a</sup>**

|                                                                                |
|--------------------------------------------------------------------------------|
| • 6 or more café au lait spots (0.5 cm in children or 1.5 cm in adults)        |
| • 2 or more cutaneous/subcutaneous neurofibromas or one plexiform neurofibroma |
| • Axillary or inguinal freckling                                               |
| • Optic pathway glioma                                                         |
| • 2 or more Lisch nodules (iris hamartomas seen on slit lamp examination)      |
| • Bony dysplasia (sphenoid wing dysplasia, bowing of long bone pseudarthrosis) |
| • First degree relative with NF1                                               |

a: according to the National Institutes of Health Consensus Development Conference Statement: Neurofibromatosis Arch Neurol Chicago, 1988;45:575–578.

**Supp. Text S1**

Fluorescence in situ hybridization (FISH) was performed on 200 cultured blood cells using probes RP5-1002G3 (visible as red fluorescent signals) and RP5-926B9 (green). FISH probe RP5-1002G3 is located in the telomeric region of the *NF1* gene, whereas FISH probe RP5-926B9 spans the centromeric portion of the *NF1* gene [De Raedt et al., 2004]. Thus, two red/green fusion FISH signals should be obtained from an interphase nucleus with two normal chromosomes 17. By contrast, three red/green fusion FISH signals would be expected if the *NF1* gene region is duplicated.

**Supp. Reference**

De Raedt T, Brems H, Lopez-Correa C, Vermeesch JR, Marynen P, Legius E. 2004. Genomic organization and evolution of the *NF1* microdeletion region. *Genomics* 84:346-360.

**Supp. Text S2**Clinical investigation

## Index patient R609021

The male patient R609021 was 6 years and 4 months old at the time of investigation. He exhibited clinical signs of autism spectrum disorder including hyperactivity and poor verbal communication skills. Dysmorphic facial features, a bulging forehead (marked frontal bossing), midface hypoplasia as well as bluish sclerae were also noted. His body height was 114.7 cm (25<sup>th</sup> PC), his weight was 23 kg (50-75<sup>th</sup> PC) and his head circumference was 53 cm (75-90<sup>th</sup> PC). He had five CALS which were considered to be atypical with irregular borders: one café au lait spot located on his left abdomen (size: 4 x 2 cm); one café au lait spot on his right iliac spine (2 x 2 cm); one café au lait spot on his back (0.8 x 0.2 cm); 2 CALS on his right leg (0.6 x 0.5 mm and 1.1 x 0.5 cm in size) (Supp. Figure S6). He also exhibited a single freckle in each inguinal region. On his back, a patch of Mongolian spots regressing in the lumbosacral area were observed as well as a hypopigmented spot of 1.2 x 0.5 cm in size on the right side of his chest. The following finger and palmar dermatoglyphic patterns were noted: intermediate axial triradius with transverse mainline endings as well as a central pocket loop in the right 4<sup>th</sup> and 5<sup>th</sup> fingers. The teeth of the patient were normal; dental enamel anomalies were not observed.

*Patient R809021*

Patient R609021 had a younger sister (R809021) who was 5 years and one month old at the time of clinical investigation. Her body height was 105 cm (10-25<sup>th</sup> PC), her weight was 18 kg (25-50<sup>th</sup> PC) and her head circumference was 49.8 cm (25-50<sup>th</sup> PC). Patient R809021 exhibited hyperactivity and clinical signs of an autism spectrum disorder. Furthermore, bluish sclerae and a short philtrum were noted. Café au lait spots were not observed but two small freckles were present. Analysis of the finger and palmar dermatoglyphics indicated a tendency to central pocket loop in both 4<sup>th</sup> fingers and in the right 5<sup>th</sup> finger as well as intermediate axial triradius of the left palm.

*Patient R509021*

The mother (R509021) of patients R609021 and R809021 was 28 years old at the time of clinical investigation. She exhibited short stature with a body height of 150 cm (<5<sup>th</sup> PC). Her weight was 51 kg (25-50<sup>th</sup> PC) and her head circumference was 55 cm (50<sup>th</sup> PC). She had a big forehead, a short philtrum, and multiple freckles (also seen in her father) not restricted to inguinal and axillary regions. She reported that when she was pregnant with her son, patient R609021, she developed

gestational diabetes lasting until the end of the pregnancy as well as edema. She was also diagnosed with pre-eclampsia.

Neither of the duplication carriers of this family (family 1 in Supp. Figure S2) exhibited neurofibromas.

*Index patient R653070*

Physical examination at the age of 13 years revealed 10 CALS but no neurofibromas or axillary/inguinal freckling. His height was 171.5 cm (90<sup>th</sup> PC), weight 59.5 kg (80<sup>th</sup> PC) and his head circumference was 56.5 cm (75<sup>th</sup> to 90<sup>th</sup> PC).
